# Supplementary material for: Technical Report Writing as a Pedagogic Genre: Metadiscourse Features of Proximity and Positioning in Student Writing
Source: Research Square preprint supplement (doi:10.21203/rs.3.rs-7495462/v1), 2025-09-15
Supplement: Supplementary file 1 [file 0839f652ab88d4b222977a9a.docx]

| **Marker** | **Function** | **Frequency** | **Percentage** |
| --- | --- | --- | --- |
| *We* |  | 1241 |  |
|  | Author reference *we* | 826 | 66.56% |
|  | Reader-inclusive *we* | 415 | 33.44% |
| *Our* |  | 1043 |  |
|  | Author reference *our* | 695 | 65.68% |
|  | Reader-inclusive *our* | 358 | 34.32% |
| *us* |  | 277 |  |
|  | Author reference *us* | 63 | 22.74% |
|  | Reader-inclusive *us* | 214 | 77.26% |
| *the authors* | Author reference | 19 |  |

**Technical Report Writing as a Pedagogic Genre: Metadiscourse Features of Proximity and Positioning in Student Writing**

Table 4: Distribution of self- and reader-mentions in technical reports.
