# Supplementary material for: Technical Report Writing as a Pedagogic Genre: Metadiscourse Features of Proximity and Positioning in Student Writing
Source: Research Square preprint supplement (doi:10.21203/rs.3.rs-7495462/v1), 2025-09-15
Supplement: Supplementary file 2 [file 087f0579812f2a9b02ed5d76.docx]

| **Stance Marker type** | **Total Instances** | **Percentage** | **per 1K words** |
| --- | --- | --- | --- |
| Attitude Markers | 2778 | 22.55% | 5.28 |
| Hedges | 3351 | 27.20% | 6.37 |
| Boosters | 3610 | 29.30% | 6.87 |
| Self-mention | 2580 | 20.94% | 4.87 |

**Technical Report Writing as a Pedagogic Genre: Metadiscourse Features of Proximity and Positioning in Student Writing**

Table 3: Distribution of stance markers in technical reports.
