# Supplementary material for: Technical Report Writing as a Pedagogic Genre: Metadiscourse Features of Proximity and Positioning in Student Writing
Source: Research Square preprint supplement (doi:10.21203/rs.3.rs-7495462/v1), 2025-09-15
Supplement: Supplementary file 3 [file 36d88cf90164cd447996d563.docx]

**Technical Report Writing as a Pedagogic Genre: Metadiscourse Features of Proximity and Positioning in Student Writing**

| **Marker Type** | **Frequency** | **Percentage** |
| --- | --- | --- |
| Modals of obligation | 2219 | 62.67% |
| *Reader-inclusive pronouns | 987 | 27.87% |
| Endophoric Markers (*as shown in the graph, figure X*) | 131 | 3.70% |
| Reader mentions | 111 | 3.13% |
| Parenthetical Endophoric markers | 81 | 2.29% |
| Asides | 12 | 0.34% |

*Reader-inclusive pronouns are included twice to indicate their engagement function.

Table 5: Frequency and distribution of various engagement devices in technical reports.
