# Supplementary material for: Technical Report Writing as a Pedagogic Genre: Metadiscourse Features of Proximity and Positioning in Student Writing
Source: Research Square preprint supplement (doi:10.21203/rs.3.rs-7495462/v1), 2025-09-15
Supplement: Supplementary file 4 [file 899b3d701f1cf4d75200ebb0.docx]

**Technical Report Writing as a Pedagogic Genre: Metadiscourse Features of Proximity and Positioning in Student Writing**

| **Facet** | **Frequency** | **Percentage** | ***ptw*** |
| --- | --- | --- | --- |
| Argument | 1499 | 7.37% | 2.85 |
| Organization | 2825 | 13.88% | 5.37 |
| Credibility | 164 | 0.81% | 0.31 |
| Stance | 12319 | 60.54% | 23.43 |
| Engagement | 3541 | 17.40% | 6.73 |

Table 1: Frequency of proximity facets in technical reports (per 1000 words)
