# Supplementary material for: Technical Report Writing as a Pedagogic Genre: Metadiscourse Features of Proximity and Positioning in Student Writing
Source: Research Square preprint supplement (doi:10.21203/rs.3.rs-7495462/v1), 2025-09-15
Supplement: Supplementary file 5 [file e5b8eade99084b632502d6af.docx]

**Technical Report Writing as a Pedagogic Genre: Metadiscourse Features of Proximity and Positioning in Student Writing**

| **Marker Type** | **Marker** | **Frequency** | **Normalized Frequency per one million words** | **%** |
| --- | --- | --- | --- | --- |
| Compare & Contrast Markers | However | 274 | 418.69 | 18.28% |
|  | Yet | 42 | 64.18 | 2.80% |
|  | Nevertheless | 10 | 15.28 | 0.67% |
|  | *But | 90 | 137.53 | 6.00% |
|  | On the other hand | 41 | 62.65 | 2.74% |
|  | Similarly | 17 | 25.98 | 1.13% |
|  | Likewise | 5 | 7.64 | 0.33% |
| Result Markers | Thus | 201 | 307.14 | 13.41% |
|  | Therefore | 88 | 134.47 | 5.87% |
|  | Hence | 163 | 249.08 | 10.87% |
|  | *So | 58 | 88.63 | 3.87% |
|  | As a result | 48 | 73.35 | 3.20% |
|  | *Because | 19 | 29.03 | 1.27% |
| Addition Markers | In addition/ Additionally | 155 | 236.85 | 10% |
|  | Moreover | 81 | 123.77 | 5.40% |
|  | Furthermore | 69 | 105.44 | 4.60% |
|  | Besides | 11 | 16.81 | 0.73% |
|  | *And | 23 | 35.15 | 1.53% |
|  | *Also | 104 | 158.92 | 6.94% |

Table 2: Absolute and relative frequency of markers of argument structure.
